# Supplementary material for: Dye Decoloring Peroxidase Structure, Catalytic Properties and Applications: Current Advancement and Futurity
Source: MDPI journal article supplement (doi:10.3390/catal11080955), 2021-08-10
Supplement: s1 [file s1]

## Supplementary Materials

**Table S1.** Describes the different types and specific characteristics of DyPs isolated from various bacterial strains.

| Clas | Name   | Source                           | Substrate                            | $\lambda_{max}$ | Condition       | $k_{cat}/K_m$                                               | Ref                                              |
|------|--------|----------------------------------|--------------------------------------|-----------------|-----------------|-------------------------------------------------------------|--------------------------------------------------|
|      |        |                                  |                                      | x               | n               | ( $s^{-1}M^{-1}$ )                                          |                                                  |
| A    | TcDyP  | <i>Thermomonospora curvata</i>   | Reactive Blue5                       | 595 nm          | pH 3.0<br>22 °C | $6.6 \times 10^5$                                           | (Chen et al., 2015)                              |
|      |        |                                  | Reactive Blue19                      | 595 nm          | pH 3.0<br>22 °C | $7.8 \times 10^6$                                           | (Rahmanpour, Rea, Jamshidi, Fülöp, & Bugg, 2016) |
| A    | TfuDyP | <i>Thermobifida fusca</i>        | Reactive Blue4                       | 598 nm          |                 |                                                             | (Habib, Rozeboom, & Fraaije, 2019)               |
| A    | CboDyP | <i>Cellulomonas bogoriensis</i>  | Reactive Blue 19                     | 595 nm          | pH 4.0          | $1.3 \times 10^4$                                           | (Yu et al., 2014)                                |
| A    | SviDyP | <i>Saccharomonospora viridis</i> | Reactive Blue 19                     |                 | pH 7.0          |                                                             | (Roberts et al., 2011)                           |
| B    | DyPB   | <i>Rhodococcus jostii</i> RHA1   | Reactive Blue4<br>pyrogallol<br>ABTS |                 |                 | $1.4 \times 10^2$<br>$6.0 \times 10^2$<br>$2.4 \times 10^3$ | (Mendes et al., 2015)                            |
| B    | PpDyP  | <i>Pseudomonas putida</i> MET94  | Reactive Blue 5                      |                 | pH 4.2          | $2.0 \times 10^5$                                           | (Uchida, Sasaki, Tanaka, & Ishimori, 2015)       |
| B    | VcDyP  | <i>Vibrio cholerae</i>           | Reactive Blue 5                      |                 |                 | $2.6 \times 10^4$                                           |                                                  |

|   |            |                                       |                                             |           |                  |                                            |                                         |
|---|------------|---------------------------------------|---------------------------------------------|-----------|------------------|--------------------------------------------|-----------------------------------------|
|   |            |                                       | Reactive Blue4                              |           | pH 3.0<br>22 °C  | 6.5×10 <sup>5</sup>                        |                                         |
|   |            |                                       | Reactive black<br>5                         |           | pH 3.0           | 3.6×10 <sup>2</sup>                        |                                         |
| B | BsDyP      | <i>Bacillus subtilis</i>              | Malachite<br>green                          | 595<br>nm | pH 4.0           | 6.3×10 <sup>2</sup>                        | (Dhankhar<br>et al., 2020)              |
|   |            |                                       | Methyl violet                               |           | pH 4.0           | 3.6×10 <sup>2</sup>                        |                                         |
|   |            |                                       | Reactive Blue19                             |           | pH 3.5           | 3.5×10 <sup>5</sup>                        |                                         |
| B | DyPA       | <i>Rhodococcus<br/>jostii</i> RHA1    | Reactive Blue4<br>ABTS                      |           | pH 4.0           | 1.3×10 <sup>4</sup><br>2.0×10 <sup>3</sup> | (Roberts et<br>al., 2011)               |
| B | BIDyP      | <i>Brevi bacterium<br/>linens</i>     |                                             |           |                  |                                            | (Sutter et al.,<br>2008)                |
| C | SaDyP<br>2 | <i>Streptomyces<br/>avermitilis</i>   | Acid Blue 324<br>ABTS                       | 608<br>nm | pH 4.0<br>pH 4.5 | 1.2×10 <sup>4</sup><br>1.7×10 <sup>3</sup> | (Sugawara<br>et al., 2017)              |
| C | AnaPX      | <i>Anabaena sp</i>                    | Reactive Blue5                              |           |                  | 1.2×10 <sup>7</sup>                        | (Yoshida et<br>al., 2016)               |
| C | DyP2       | <i>Amycolatopsis<br/>sp. 75iv2</i>    | Reactive Blue5                              |           |                  | 7.1×10 <sup>5</sup>                        | (Brown,<br>Barros, &<br>Chang,<br>2012) |
|   |            |                                       | ortho-<br>nitrophenol                       |           | pH 4.5           | 1.2×10 <sup>4</sup>                        |                                         |
| D | AauDy<br>P | <i>Auricularia<br/>auricula-judae</i> | meta-<br>nitropheno<br>para-<br>nitrophenol |           | pH 4.5<br>pH 4.5 | 1.0×10 <sup>4</sup><br>2.1×10 <sup>3</sup> | (Büttner et<br>al., 2015)               |
|   |            |                                       | Reactive Blue<br>19                         |           | pH 4.0           | 1.1×10 <sup>6</sup>                        | (Salvachúa,<br>Prieto,                  |
| D | IIDyP      | <i>Irpex lacteus</i>                  | Reactive Black<br>5<br>ABTS                 |           | pH 3.0<br>pH 3.0 | 5.9×10 <sup>6</sup><br>8.0×10 <sup>6</sup> | Martínez Á,<br>& Martínez,<br>2013)     |

|   |            |                                   |                                     |        |                 |                                                                   |                                |
|---|------------|-----------------------------------|-------------------------------------|--------|-----------------|-------------------------------------------------------------------|--------------------------------|
| D | Dyp        | <i>Geotrichum candidum</i> Dec 1  | Reactive Blue 5                     | 556 nm | pH 5.5<br>30 °C | 4.8×10 <sup>6</sup>                                               | (Kim & Shoda, 1999)            |
| D | AauDy P2   | <i>Auricularia auricula-judae</i> | Reactive Blue 5                     |        | pH 4.5          | 1.7×10 <sup>7</sup>                                               | (Liers et al., 2013)           |
| D | Pleos-DyP1 | <i>Pleurotus ostreatus</i>        | Reactive Blue 19                    |        | pH 4.5          | 1.1×10 <sup>5</sup>                                               | (Fernández-Fueyo et al., 2015) |
| D | Pleos-DyP4 | <i>Pleurotus ostreatus</i>        | Reactive Blue 19                    |        | pH 4.5          | 1.9×10 <sup>6</sup>                                               |                                |
| D | rPsaDy P   | <i>Pleurotus sapidus</i>          | Guaiacol<br>Reactive Blue 5<br>ABTS |        |                 | 1.0×10 <sup>5</sup><br>7.5×10 <sup>5</sup><br>3.8×10 <sup>6</sup> | (Lauber et al., 2017)          |

1. Brown, M. E., Barros, T., & Chang, M. C. (2012). Identification and characterization of a multifunctional dye peroxidase from a lignin-reactive bacterium. *ACS Chem Biol*, 7(12), 2074-2081. doi:10.1021/cb300383y
2. Büttner, E., Ullrich, R., Strittmatter, E., Piontek, K., Plattner, D. A., Hofrichter, M., & Liers, C. (2015). Oxidation and nitration of mononitrophenols by a DyP-type peroxidase. *Arch Biochem Biophys*, 574, 86-92. doi:10.1016/j.abb.2015.03.003
3. Chen, C., Shrestha, R., Jia, K., Gao, P. F., Geisbrecht, B. V., Bossmann, S. H., . . . Li, P. (2015). Characterization of Dye-decolorizing Peroxidase (DyP) from *Thermomonospora curvata* Reveals Unique Catalytic Properties of A-type DyPs. *J Biol Chem*, 290(38), 23447-23463. doi:10.1074/jbc.M115.658807
4. Dhankhar, P., Dalal, V., Mahto, J. K., Gurjar, B. R., Tomar, S., Sharma, A. K., & Kumar, P. (2020). Characterization of dye-decolorizing peroxidase from *Bacillus subtilis*. *Arch Biochem Biophys*, 693, 108590. doi:10.1016/j.abb.2020.108590
5. Fernández-Fueyo, E., Linde, D., Almendral, D., López-Lucendo, M. F., Ruiz-Dueñas, F. J., & Martínez, A. T. (2015). Description of the first fungal dye-decolorizing peroxidase oxidizing manganese(II). *Appl Microbiol Biotechnol*, 99(21), 8927-8942. doi:10.1007/s00253-015-6665-3
6. Habib, M. H., Rozeboom, H. J., & Fraaije, M. W. (2019). Characterization of a New DyP-Peroxidase from the Alkaliphilic Cellulomonad, *Cellulomonas bogoriensis*. *Molecules*, 24(7). doi:10.3390/molecules24071208
7. Kim, S. J., & Shoda, M. (1999). Purification and characterization of a novel peroxidase from *Geotrichum candidum* dec 1 involved in decolorization of dyes. *Appl Environ Microbiol*, 65(3), 1029-1035. doi:10.1128/aem.65.3.1029-1035.1999
8. Lauber, C., Schwarz, T., Nguyen, Q. K., Lorenz, P., Lochnit, G., & Zorn, H. (2017). Identification, heterologous expression and characterization of a dye-decolorizing peroxidase of *Pleurotus sapidus*. *AMB Express*, 7(1), 164. doi:10.1186/s13568-017-0463-5
9. Liers, C., Pecyna, M. J., Kellner, H., Worrich, A., Zorn, H., Steffen, K. T., . . . Ullrich, R. (2013). Substrate oxidation by dye-decolorizing peroxidases (DyPs) from wood- and litter-degrading agaricomycetes compared to other fungal and plant heme-peroxidases. *Appl Microbiol Biotechnol*, 97(13), 5839-5849. doi:10.1007/s00253-012-4521-2
10. Mendes, S., Brissos, V., Gabriel, A., Catarino, T., Turner, D. L., Todorovic, S., & Martins, L. O. (2015). An integrated view of redox and catalytic properties of B-type PpDyP from *Pseudomonas putida* MET94 and its distal variants. *Arch Biochem Biophys*, 574, 99-107. doi:10.1016/j.abb.2015.03.009

11. Rahmanpour, R., Rea, D., Jamshidi, S., Fülöp, V., & Bugg, T. D. (2016). Structure of *Thermobifida fusca* DyP-type peroxidase and activity towards Kraft lignin and lignin model compounds. *Arch Biochem Biophys*, 594, 54-60. doi:10.1016/j.abb.2016.02.019
12. Roberts, J. N., Singh, R., Grigg, J. C., Murphy, M. E., Bugg, T. D., & Eltis, L. D. (2011). Characterization of dye-decolorizing peroxidases from *Rhodococcus jostii* RHA1. *Biochemistry*, 50(23), 5108-5119. doi:10.1021/bi200427h
13. Salvachúa, D., Prieto, A., Martínez Á, T., & Martínez, M. J. (2013). Characterization of a novel dye-decolorizing peroxidase (DyP)-type enzyme from *Irpex lacteus* and its application in enzymatic hydrolysis of wheat straw. *Appl Environ Microbiol*, 79(14), 4316-4324. doi:10.1128/aem.00699-13
14. Sugawara, K., Nishihashi, Y., Narioka, T., Yoshida, T., Morita, M., & Sugano, Y. (2017). Characterization of a novel DyP-type peroxidase from *Streptomyces avermitilis*. *J Biosci Bioeng*, 123(4), 425-430. doi:10.1016/j.jbiosc.2016.12.001
15. Sutter, M., Boehringer, D., Gutmann, S., Günther, S., Prangishvili, D., Loessner, M. J., . . . Ban, N. (2008). Structural basis of enzyme encapsulation into a bacterial nanocompartment. *Nat Struct Mol Biol*, 15(9), 939-947. doi:10.1038/nsmb.1473
16. Uchida, T., Sasaki, M., Tanaka, Y., & Ishimori, K. (2015). A Dye-Decolorizing Peroxidase from *Vibrio cholerae*. *Biochemistry*, 54(43), 6610-6621. doi:10.1021/acs.biochem.5b00952
17. Yoshida, T., Ogola, H. J., Amano, Y., Hisabori, T., Ashida, H., Sawa, Y., . . . Sugano, Y. (2016). *Anabaena* sp. DyP-type peroxidase is a tetramer consisting of two asymmetric dimers. *Proteins*, 84(1), 31-42. doi:10.1002/prot.24952
18. Yu, W., Liu, W., Huang, H., Zheng, F., Wang, X., Wu, Y., . . . Jin, Y. (2014). Application of a novel alkali-tolerant thermostable DyP-type peroxidase from *Saccharomonospora viridis* DSM 43017 in biobleaching of eucalyptus kraft pulp. *PLoS One*, 9(10), e110319. doi:10.1371/journal.pone.0110319
